# Supplementary material
Source: Springer Nature journal article supplement (https://hal.science/hal-01290551v1/file/13567_2013_355_MOESM6_ESM.pdf)

**A**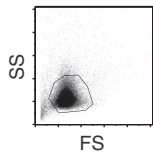**B**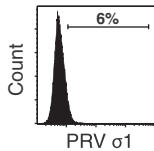**C**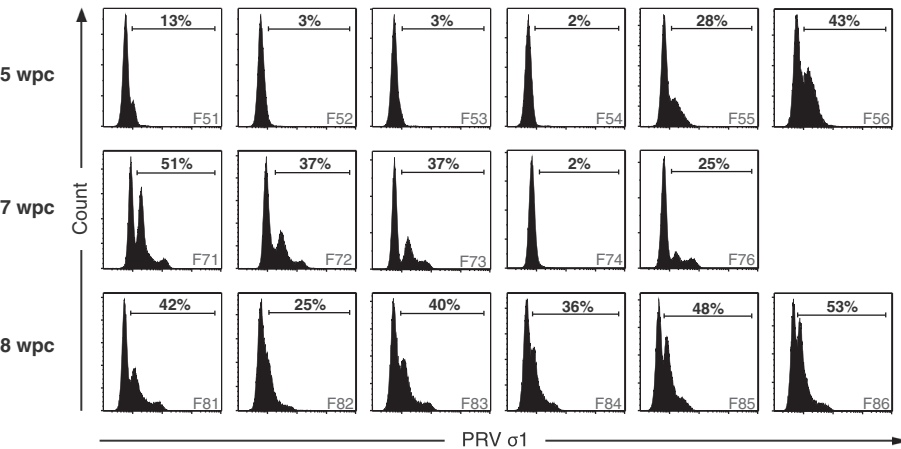**D**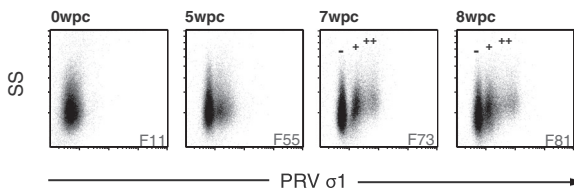

Supplement: MOESM6 [file 13567_2013_355_MOESM6_ESM.pdf]
